# Supplementary material for: A sustainable methodology employing the extract of red dragon fruit peel as a fluorescence probe for detection of indigo carmine (E132) in food samples: evaluation of the method's greenness, whiteness, and blueness
Source: Royal Society of Chemistry journal article supplement (doi:10.1039/d4ra02613f), 2024-01-01
Supplement: d4ra02613f1.pdf [file d4ra02613f1.pdf]

## Supplementary material

**Title: A sustainable methodology employing the extract of red dragon fruit peel as a fluorescence probe for detection of indigo carmine (E132) in food samples: Evaluating the method's greenness, whiteness, and blueness**

## Supplementary Tables

**Table S1: The used parameters in the assessment and evaluation of greenness for the suggested method**

| <b>Tool</b>      | <b>Used parameter</b>                                         | <b>Ref.</b> |
|------------------|---------------------------------------------------------------|-------------|
| Modified NEMI    | Using publicly available chemical databases                   | [25]        |
| Complex GAPI     | Using the Analytical ComplexGAPI Metric approach and Software | [26]        |
| AGREE prep       | Using the Analytical GREENness Metric approach and Software   | [27]        |
| BAGI tool        | Using the BAGI algorithm and Software                         | [28]        |
| RGB12 evaluation | Using the Analytical RGB 12 algorithm                         | [29]        |
| NQS index        | Using the RGB 12 algorithm provoked forth by Kiwfo et al.     | [30]        |

## Supplementary Figures

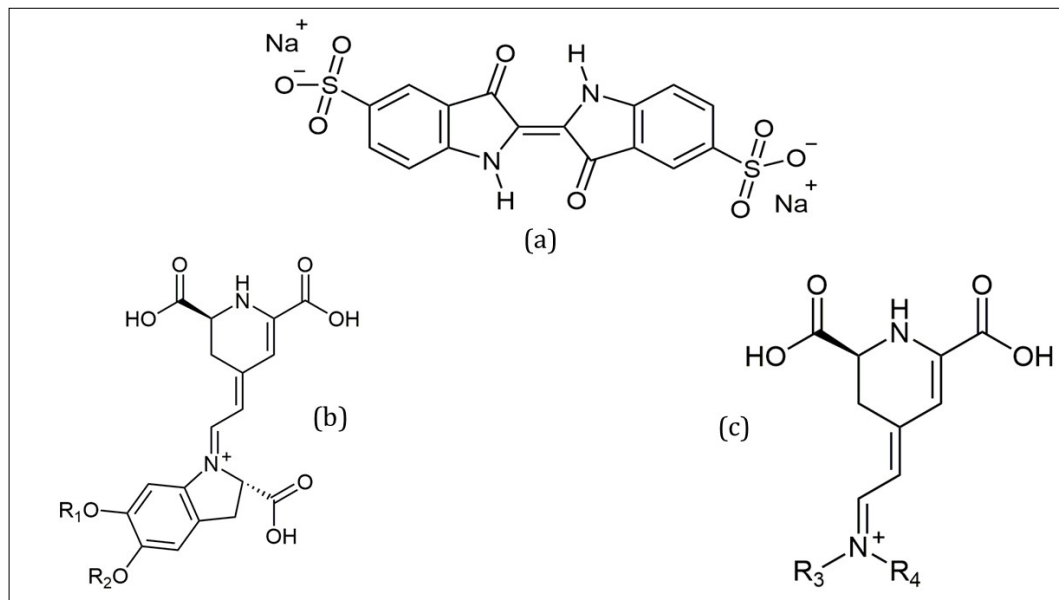

**Figure S1: (a) for the chemical structure of indigo carmine, (b) for the chemical structure of betacyanins, and (c) for the chemical structure of betaxanthins.  $\text{R}_1$  and  $\text{R}_2$ : hydrogen or sugar moieties;  $\text{R}_3$ : amine or amino acid group;  $\text{R}_4$ : usually hydrogen.**

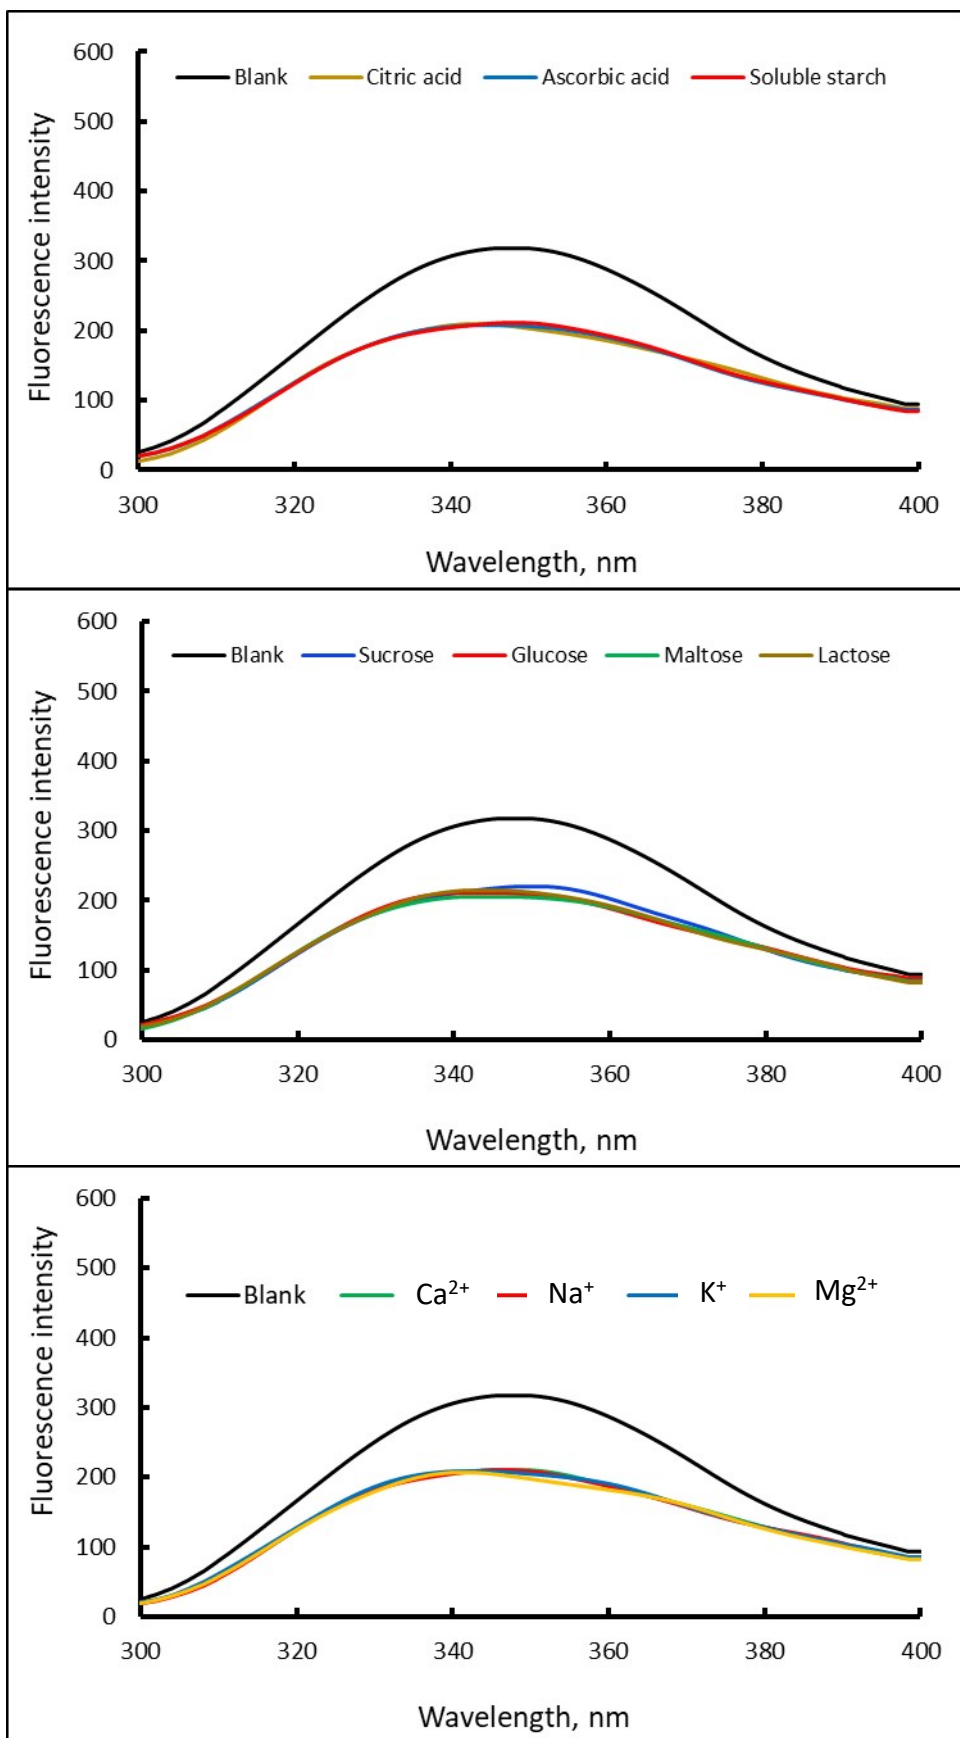

**Figure S2: Spectra for the selectivity study for the proposed method.**

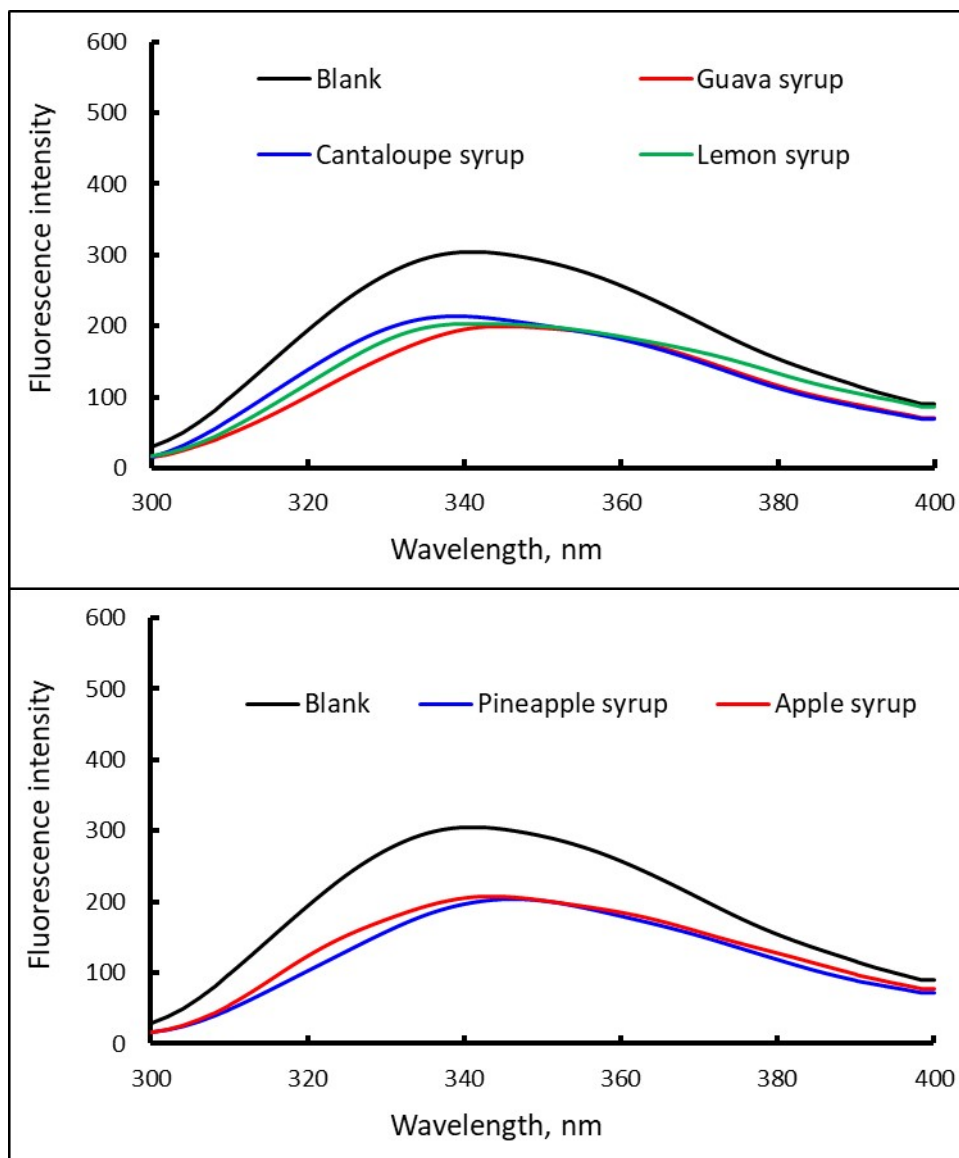

**Figure S3: Spectra for the detection of spiked indigo carmine dye in different syrup samples by the proposed method.**

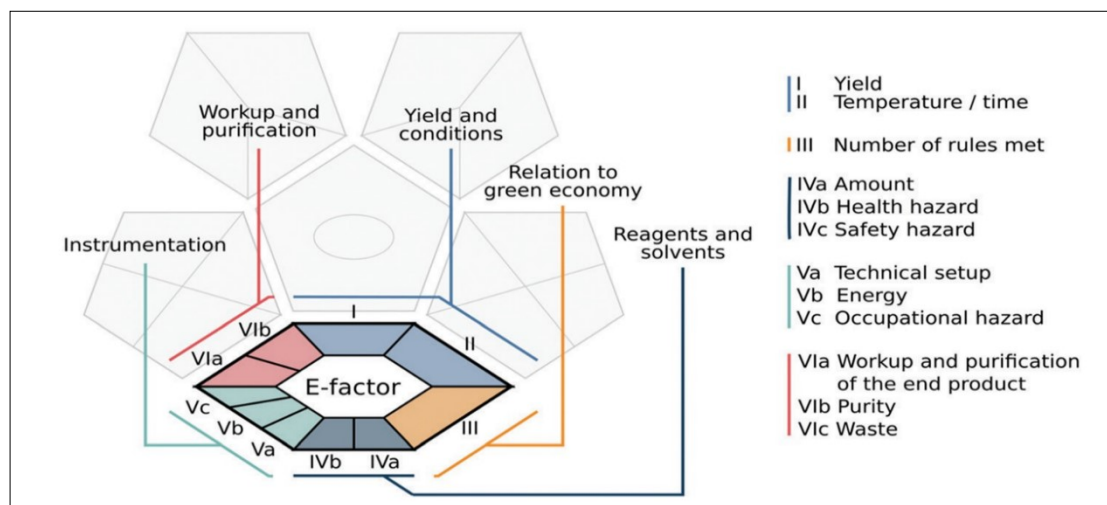

Figure S4. The ComplexGAPI pictogram, with the original GAPI pictogram greyed out in the background, and particular fields of the added hexagonal glyph are grouped and color-coded for clarity.

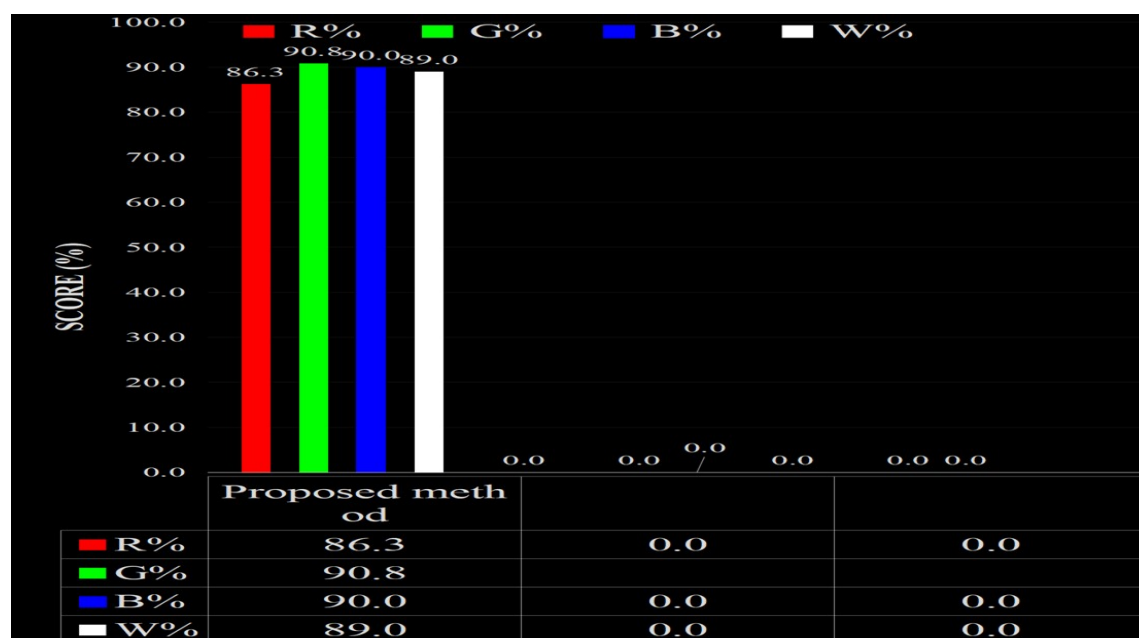

Figure S5: The redness, greenness, blueness, and whiteness profiles of the proposed method obtained by the RGB 12 algorithm.

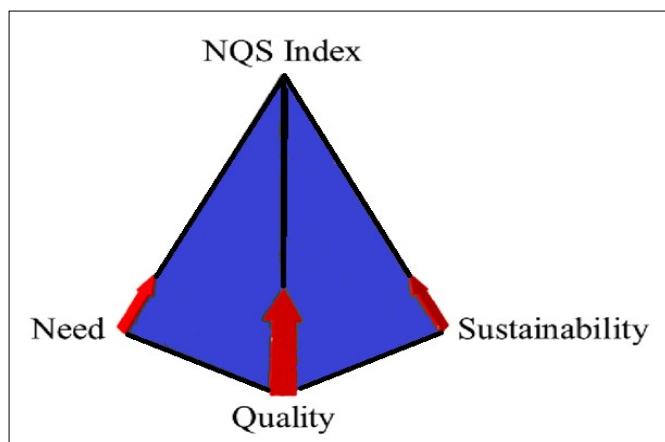

**Figure S6: A triangular pyramid illustrates analytical chemistry for sustainability according to the Need, Quality, and Sustainability (NQS) index.**
